# Supplementary material
Source: Royal Society of Chemistry journal article supplement (doi:10.1039/d6ma00073h)
Supplement: d6ma00073h1.pdf [file d6ma00073h1.pdf]

## SUPPLEMENTARY INFORMATION

### 1. Synthesis of ionic liquid

#### a) Synthesis of ionic liquid precursor 1-ethyl-3-methylimidazolium bromide(EMIM-Br)

The 1-methylimidazole (1.62 mL) was first added into ethyl acetate (2.73 mL) (ratio 2:3) and stirred at 45°C for one hour. Bromoethane(1.56mL) was added dropwise into the stirred solution and refluxed for another 5 hours. High purity of [EMIm] Br was obtained using extraction (water: ethyl acetate=1:1). The obtained EMIm Br was concentrated in a rotary evaporator at 60°C for one hour. The yellow viscous liquid was dried in a vacuum oven at 60°C overnight. ( All the reaction was carried out in a nitrogen atmosphere).

#### b) Synthesis of ionic liquid 1-ethyl-3-methyl imidazolium bis(trifluoromethyl sulfonyl imide) (EMIM-TFSI)

EMIM-TFSI was prepared by the anion exchange between EMIM-Br(ionic liquid precursor) and LiTFSI.(Lithium bis(trifluoromethylsulfonyl imide). At first, 0.01 mol of 1-ethyl-3-methyl imidazolium bromide dissolved in 0.02 mol of acetonitrile and added dropwise 0.01 mol of LiTFSI dissolved in acetonitrile and stirred for 24 hours at 25°C in the presence of a nitrogen atmosphere. After the completion of the anion exchange reaction, the viscous liquid was washed with hexane several times to remove LiBr. The resultant ionic liquid was concentrated in a vacuum rotary evaporator (1.5 h at 65°C), followed by drying in a vacuum oven at 60°C for another 48 hours. According to the calculations, for EMIM-TFSI the theoretical yield based on 0.01 mol of EMIM-Br was found to be 3.91 g , and the resultant product mass 3g, giving the experimental yield of ~76%.

#### c) Synthesis of ionic liquid 1-ethyl-3-methyl imidazolium (EMIM-Ac)

EMIM-Ac was prepared by the anion exchange between EMIM-Br(ionic liquid precursor) and KAc ( Potassium acetate). At first, 0.01 mol of 1-ethyl-3-methyl imidazolium bromide and 0.01 mol of potassium acetate added in 10 mL of methanol and stirred for 24 hours at 25°C in the presence of a nitrogen atmosphere. After the completion of the anion exchange reaction, KBr sediment was decanted off from EMIM-Ac. The resultant ionic liquid was concentrated in a vacuum rotary evaporator (1.5 h at 45°C), followed by drying in a vacuum oven at 60 °C for another 48 hours. For EMIM-Ac the theoretical yield based on 0.01 mol of EMIM-Br was found to be 1.7g and the resultant product was 1.43 g , giving the experimental yield of ~84%.

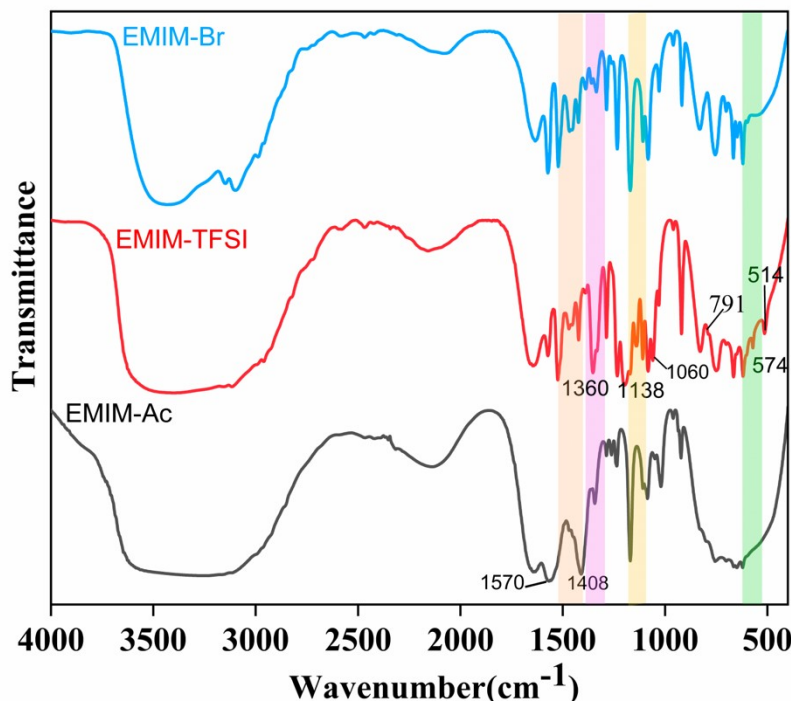

Figure- S1 FTIR Graph of the prepared three ionic liquids. a) EMIM-Br b) EMIM-TFSI C) EMIIM-Ac

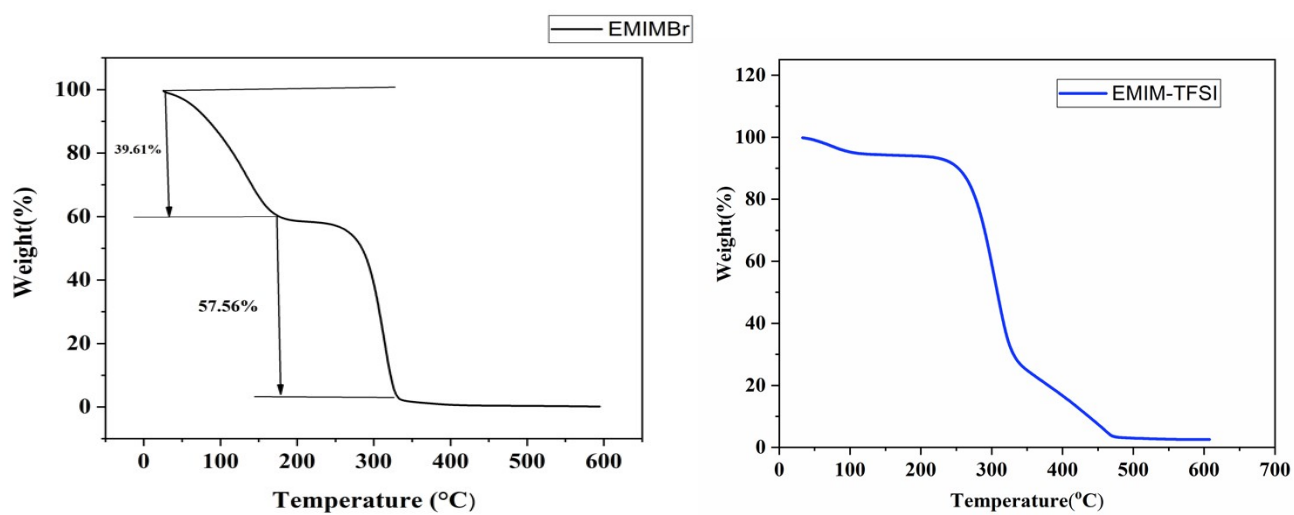

Figure-S2 TGA Graph of the prepared ionic liquids a) EMIM-Br, b) EMIM-TFSI

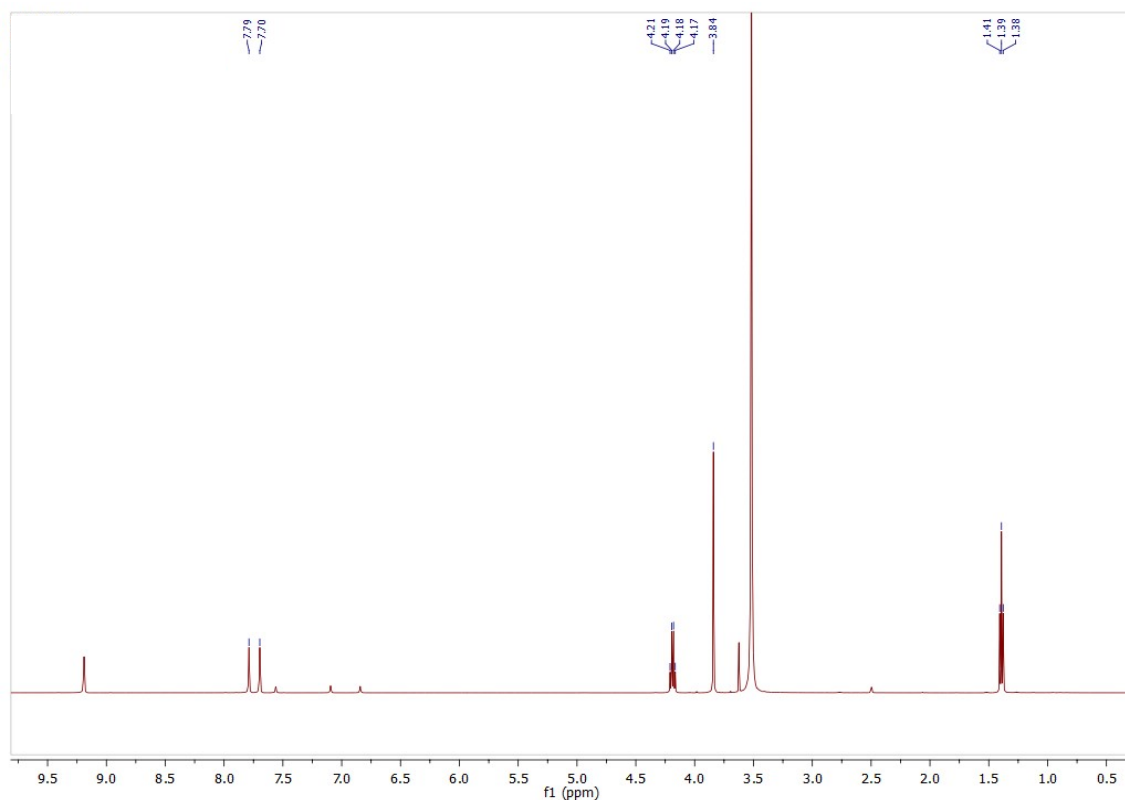

Figure- S3 a) NMR spectra of ionic liquid 1-ethyl-3-methyl imidazolium bis(trifluoro)methane sulfonyl imide (EMIM-TFSI).

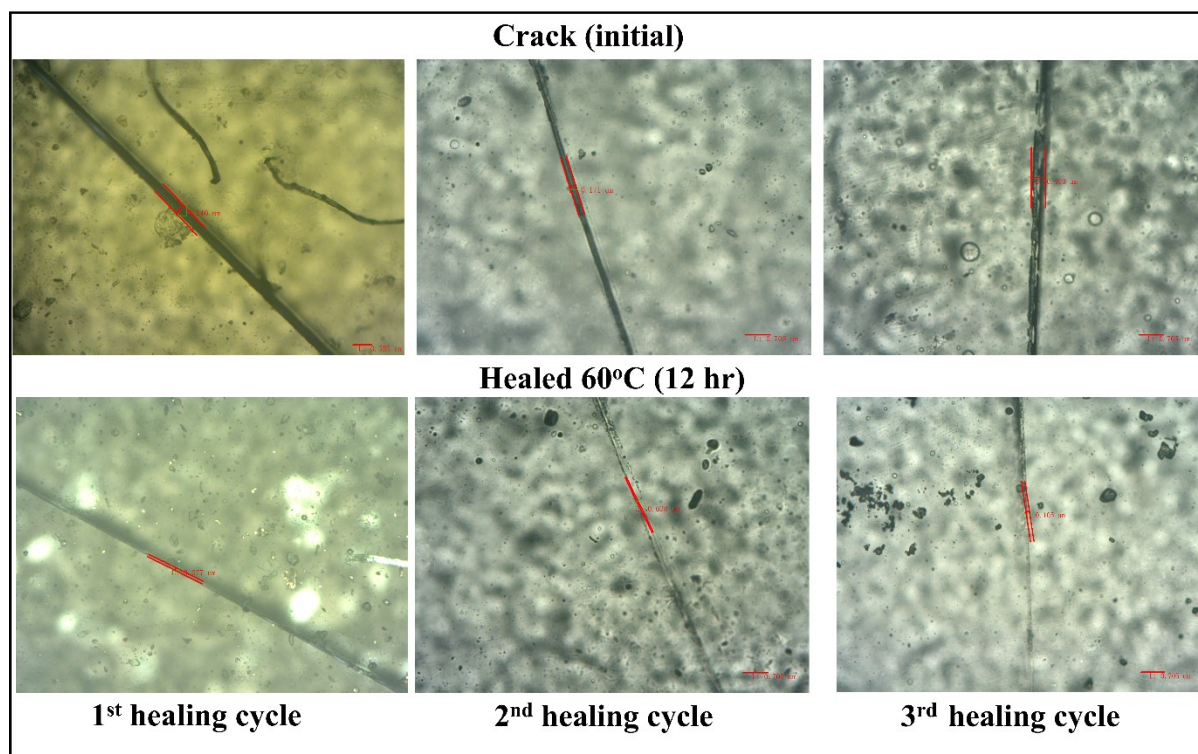

Figure-S4 Optical microscopy images showing multiple self-healing cycles of the polymer electrolyte after repeated cutting and healing.

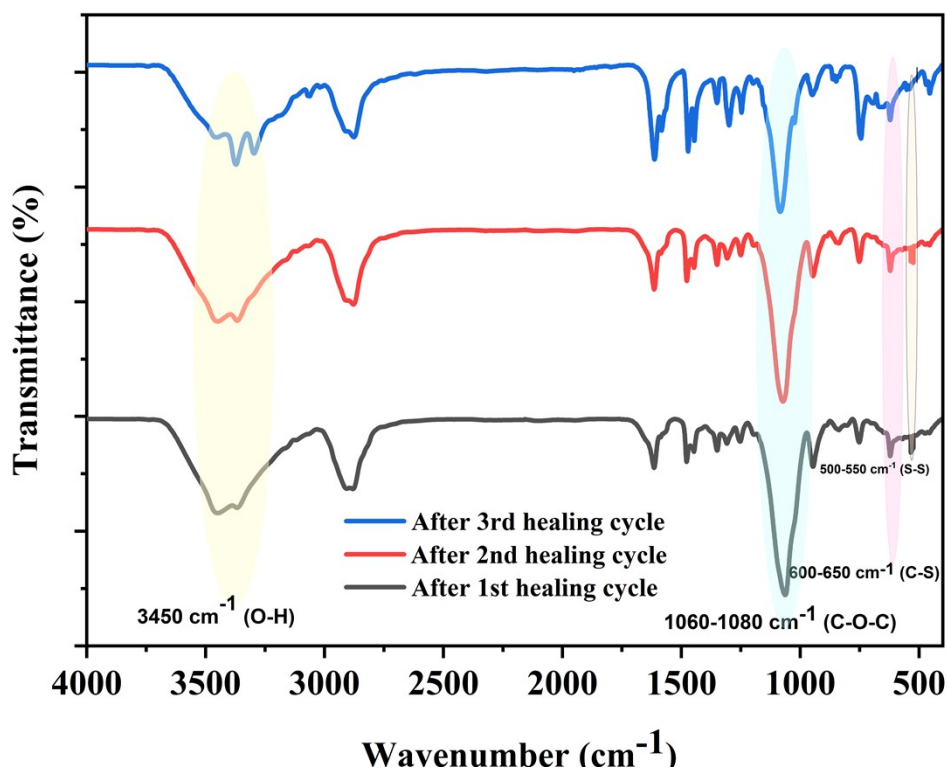

Figure -S5 FTIR spectroscopy of PMALT-0.5 after multiple healing cycles

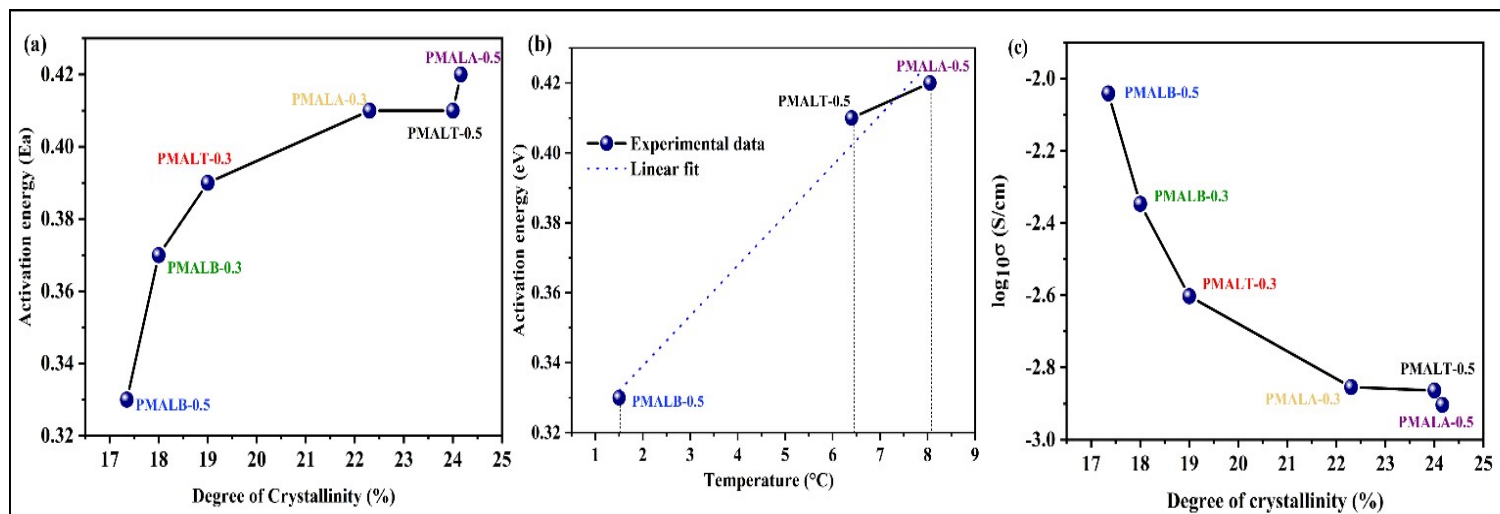

Figure-S6 Relationship between (a) Activation energy ( $E_a$ ) and Degree of crystallinity (b) Activation energy ( $E_a$ ) and Temperature (Glass transition temperature) ( $T_g$ ) (c) logarithm of conductivity ( $\log_{10} \sigma$ ) and degree of crystallinity.

Table-S1 Values of crystallinity, activation energy, glass transition temperature and ionic conductivity for all the prepared samples.

| PROPERTY                     | PMALA-0.5              | PMALT-0.5             | PMALA-0.3            | PMALT-0.3            | PMALB-0.3            | PMALB-0.5             |
|------------------------------|------------------------|-----------------------|----------------------|----------------------|----------------------|-----------------------|
| Degree of crystallinity      | 24.16%                 | 24%                   | 22.3%                | 19%                  | 18%                  | 17.35%                |
| Activation energy (eV)       | 0.42                   | 0.41                  | 0.41                 | 0.39                 | 0.37                 | 0.33                  |
| Glass-transition temperature | 8.05°C                 | 6.4°C                 | -                    | -                    | -                    | 1.5°C                 |
| Ionic-conductivity (S/cm)    | 1.25 *10 <sup>-3</sup> | 1.37*10 <sup>-3</sup> | 1.4*10 <sup>-3</sup> | 2.5*10 <sup>-3</sup> | 4.5*10 <sup>-3</sup> | 9.13*10 <sup>-3</sup> |

**Equation used for calculating the crystallinity value-**

the values of crystallinity for all the samples has been calculated using **the equation ES-1** below:

$$Crystallinity(\%) = \frac{Area\ of\ peak}{Area\ of\ the\ whole\ curve} * 100.....(1)$$

The values calculated follows the order PMALA 0.5 ( 24.26%) > PMALT 0.5 (24%) > PMALA 0.3 (22.3) > PMALT 0.3 (19%) > PMALB 0.3 ( 18%) > PMALB 0.5 (17.35).
